# Supplementary material for: Long-Term Transcriptional Activity at Zero Growth of a Cosmopolitan Rare Biosphere Member
Source: PubMed Central journal article supplement (PMC6372793; doi:10.1128/mbio.02189-18), 2019-02-12

Fig. S5.

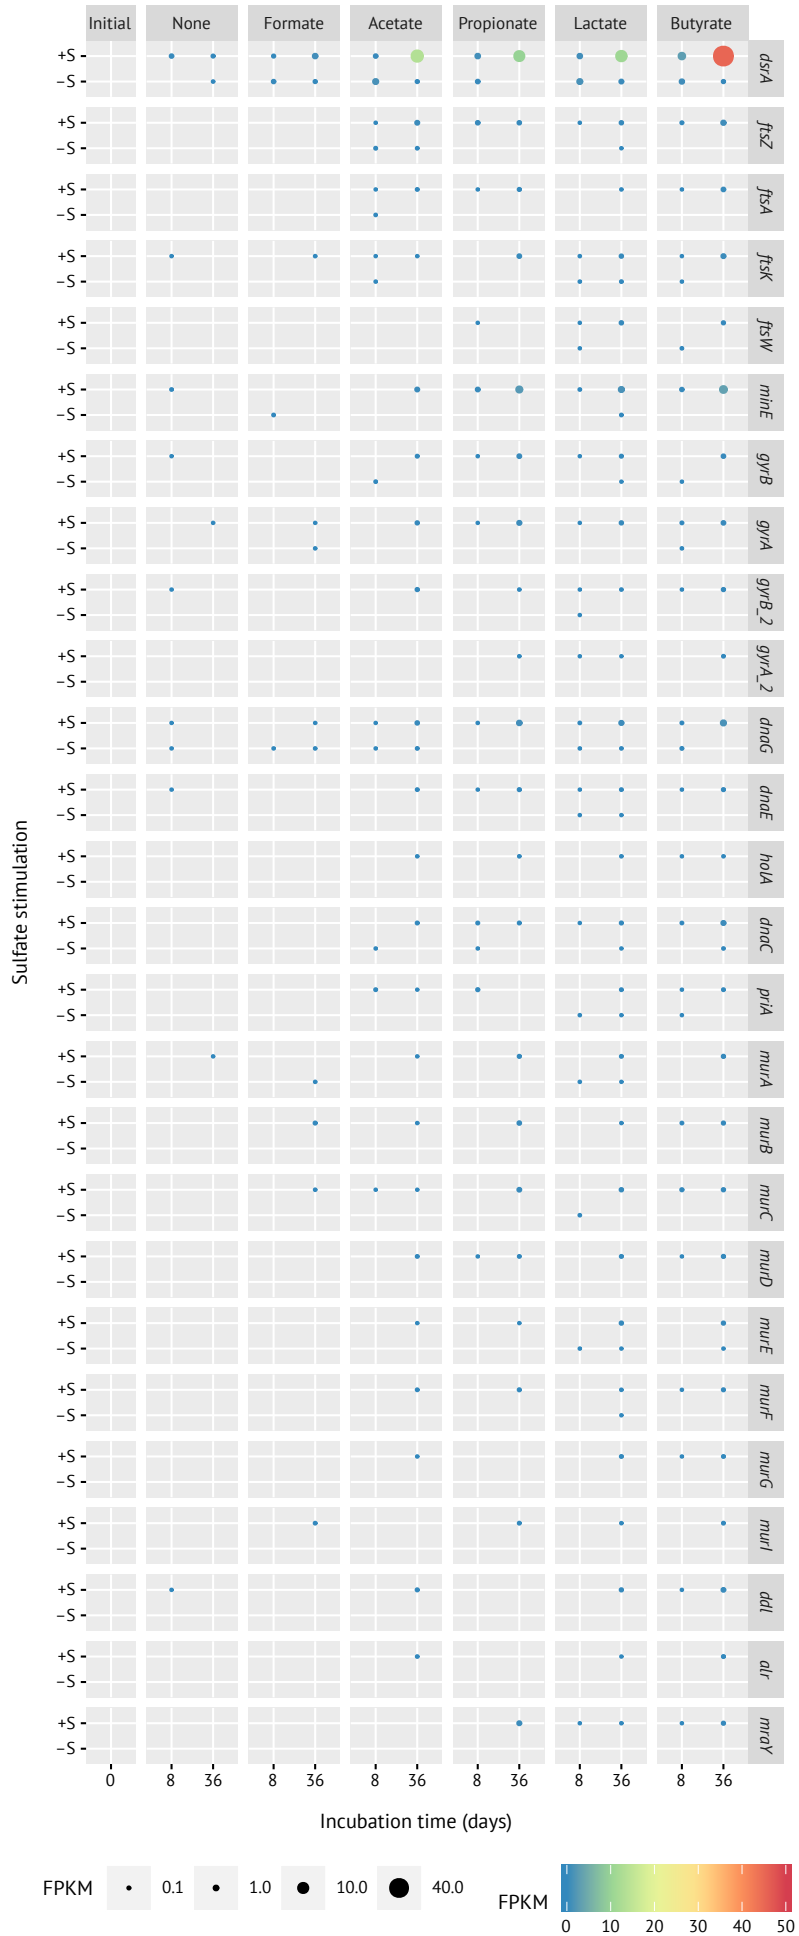

Supplement: mBio.02189-18-sf005.pdf [file mBio.02189-18-sf005.pdf]
